# Supplementary material
Source: PubMed Central journal article supplement (PMC7784933)

# Performing IVT Injection:

## Pre-procedure

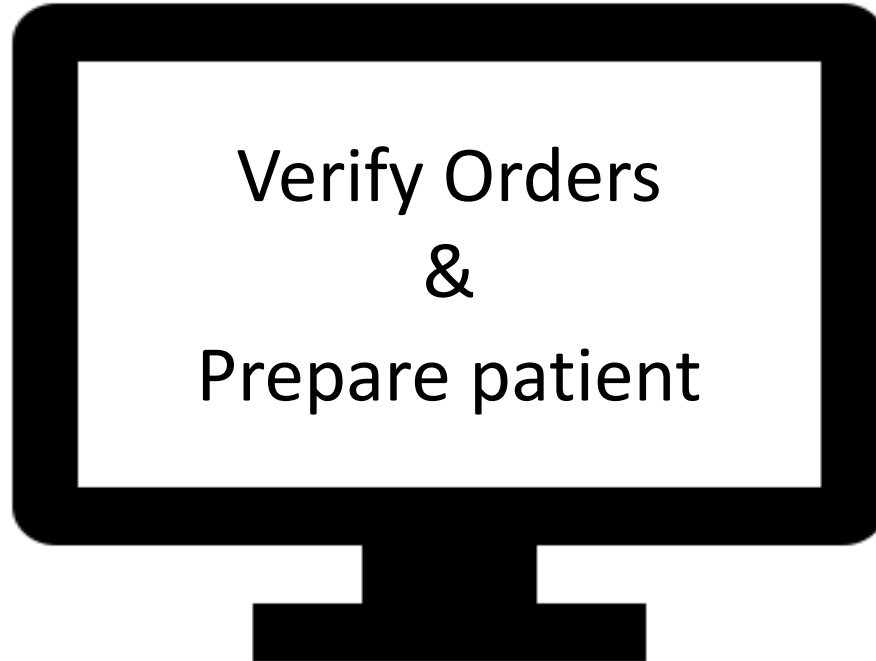

# Performing IVT Injection:

## Pre-procedure: Visual Acuity Summary

- ✓ Ensure baseline intra-ocular pressure (IOP) is available
- ✓ Ensure IOP is normal on procedure day i.e.  $\leq 23\text{mmHg}$
- ✓ To inform Dr if IOP is abnormal -normal IOP is critical prior to administering IVT injection

# Performing IVT Injection:

## Pre-procedure: Marking site of Injection

- Marking site of injection with  
with  

RIGHT / LEFT

  
sticker

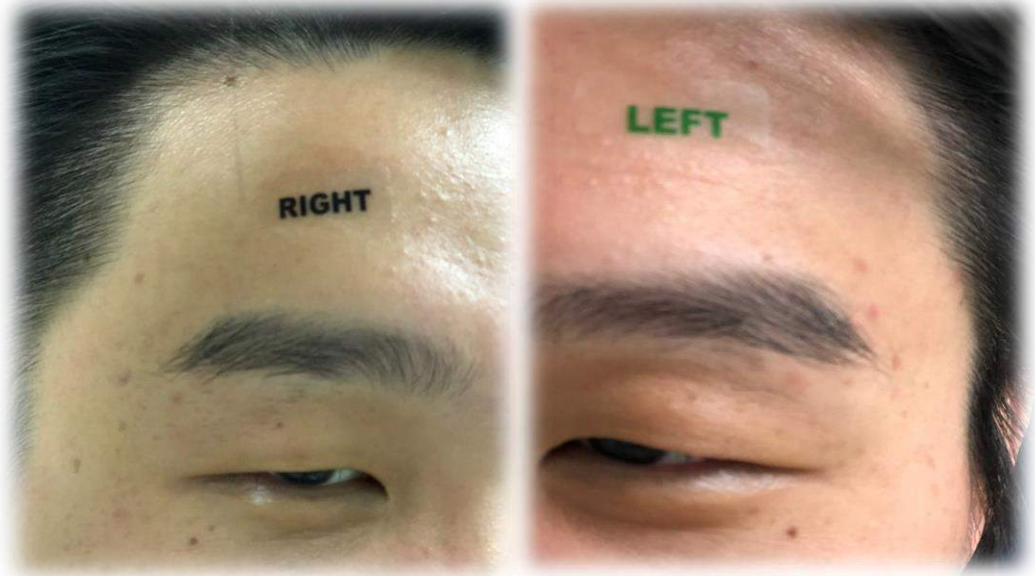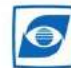

Singapore National  
Eye Centre  
SingHealth

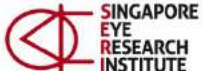

SINGAPORE  
EYE  
RESEARCH  
INSTITUTE

# Performing IVT Injection:

## Pre-procedure: Ocular surface preparation

- Assess patient's eyelid and eye for risk factors:
  - Chalazion
  - Severe blepharitis
  - Conjunctivitis

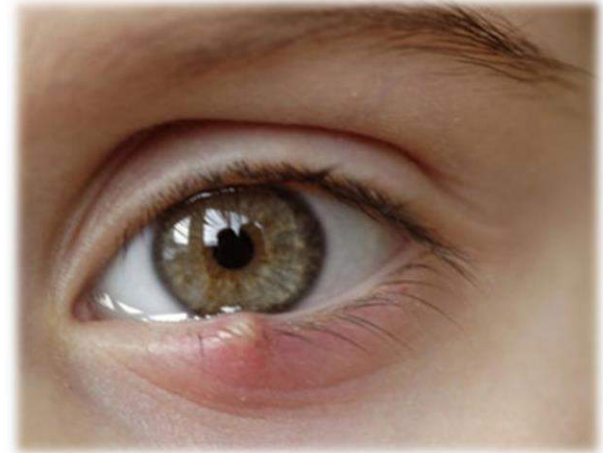

Figure 1: A stye is a red, sore lump near the edge of the eyelid (American Academy of Ophthalmology 2019)

### **Take Note:**

When in doubt, get Vitreo-Retina team Dr to review eye and assess if safe for intravitreal injection treatment.

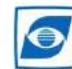

Singapore National  
Eye Centre  
SingHealth

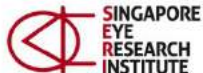

SINGAPORE  
EYE  
RESEARCH  
INSTITUTE

# Performing IVT Injection:

## Pre-procedure: Ocular surface preparation

### 2) Guidelines for IVT patients requiring lid Hygiene with Povidone Iodine 5% cleansing

- Nurse to assess the eye before IVT injection.
- If any of the following eye symptoms is noted, clean the injection eye with Povidone Iodine 5% solution at preparation area with at least a contact time of 10minutes before performing IVT injection.

- Visible Crusting
- Minimal Discharges
- Slightly Red/Swollen Lid Margins

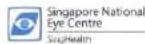

Singapore National Eye Centre  
SingHealth

#### MEMORANDUM

To : All ONIC Doctors and Nurses  
Date : 1 November 2023  
Subject : 1) Nursing rights on instillation of Graft-Tecra 0.2% for IVT and/or  
2) Nursing Guidelines for IVT patients requiring lid hygiene  
cleansing.

#### 1) Nursing Rights on instillation of Graft-Tecra 0.2% for IVT and/or and/or 5%

- If patient is allergic to Povidone Iodine 5%, avoid  
use for IVT injection. Check for iodine sensitivity test.

#### 2) Guidelines for IVT patients requiring lid hygiene with Povidone

- Nurse to assess the eye before IVT injection.
- If any of the following eye symptoms is noted, clean the  
solution at preparation area with at least a contact time  
injection.

- Visible Crusting
- Minimal Discharges
- Slightly Red/Swollen Lid Margins

PATIENTS. AT THE HEART OF ALL WE DO.™

SingHealth Eye Care Services Medical Centre  
Singapore National Eye Centre (SNEC) Singapore National Eye Centre (SNEC) Singapore National Eye Centre (SNEC)  
Singapore National Eye Centre (SNEC) Singapore National Eye Centre (SNEC) Singapore National Eye Centre (SNEC)  
Singapore National Eye Centre (SNEC) Singapore National Eye Centre (SNEC) Singapore National Eye Centre (SNEC)

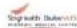

SingHealth

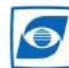

Singapore National Eye Centre  
SingHealth

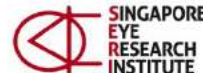

SINGAPORE EYE RESEARCH INSTITUTE

# Performing IVT Injection:

## Pre-procedure: Ocular surface preparation

- 2 cycles of:
    - Tetracaine 1%
    - Povidone Iodine 5%
- } 5 minutes apart

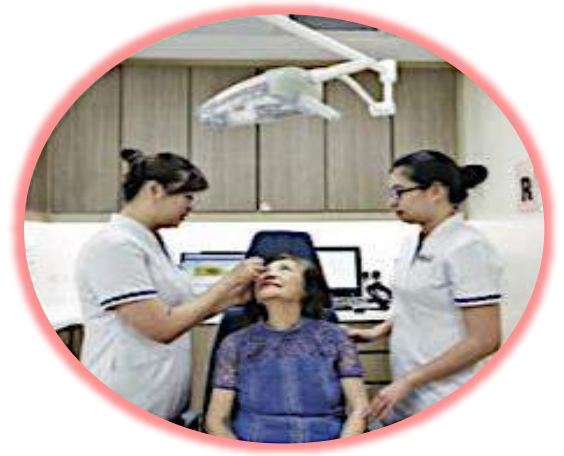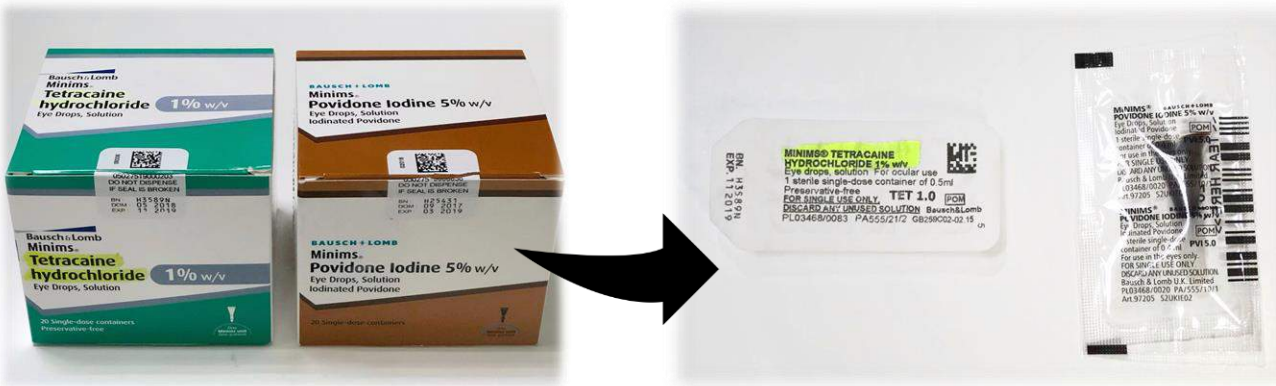

# Performing IVT Injection:

## Pre-procedure: Time Out

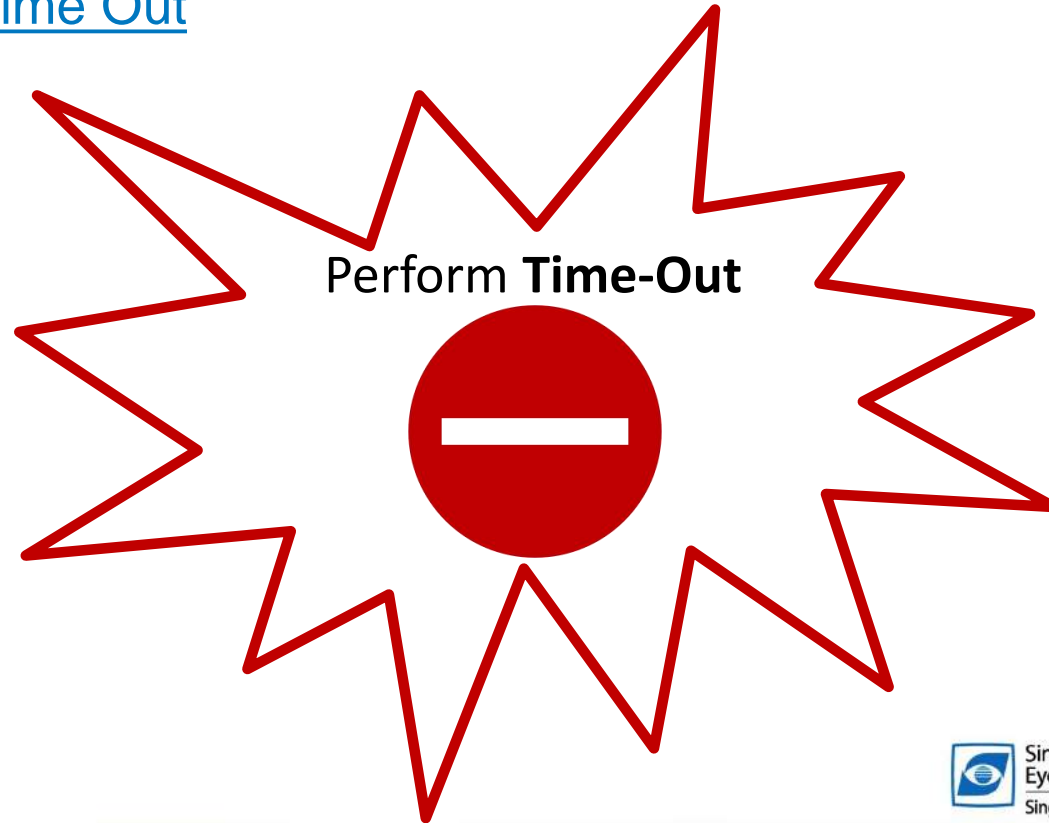

# Performing IVT Injection:

During procedure: Consumables needed

## Sterile Gloves

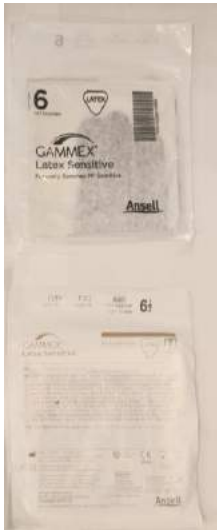

## IVT Procedure Set

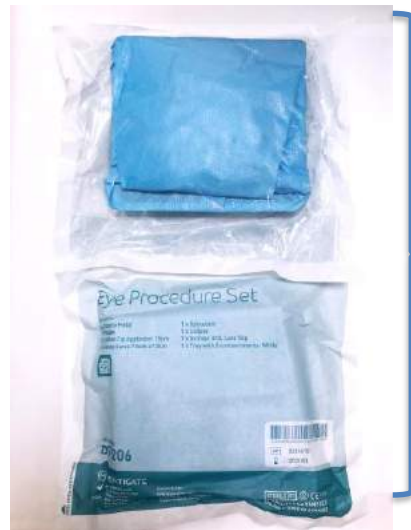

### Contains:

- Tray with 3 compartments
- Cotton Tip Applicator
- Gauze
- Disposable Speculum
- Disposable Caliper

## Others

- Surgical mask
- 30G needles
- +/- 1ml syringe
- Filter needle (if needed)



# Performing IVT Injection:

During procedure: Prepare sterile field

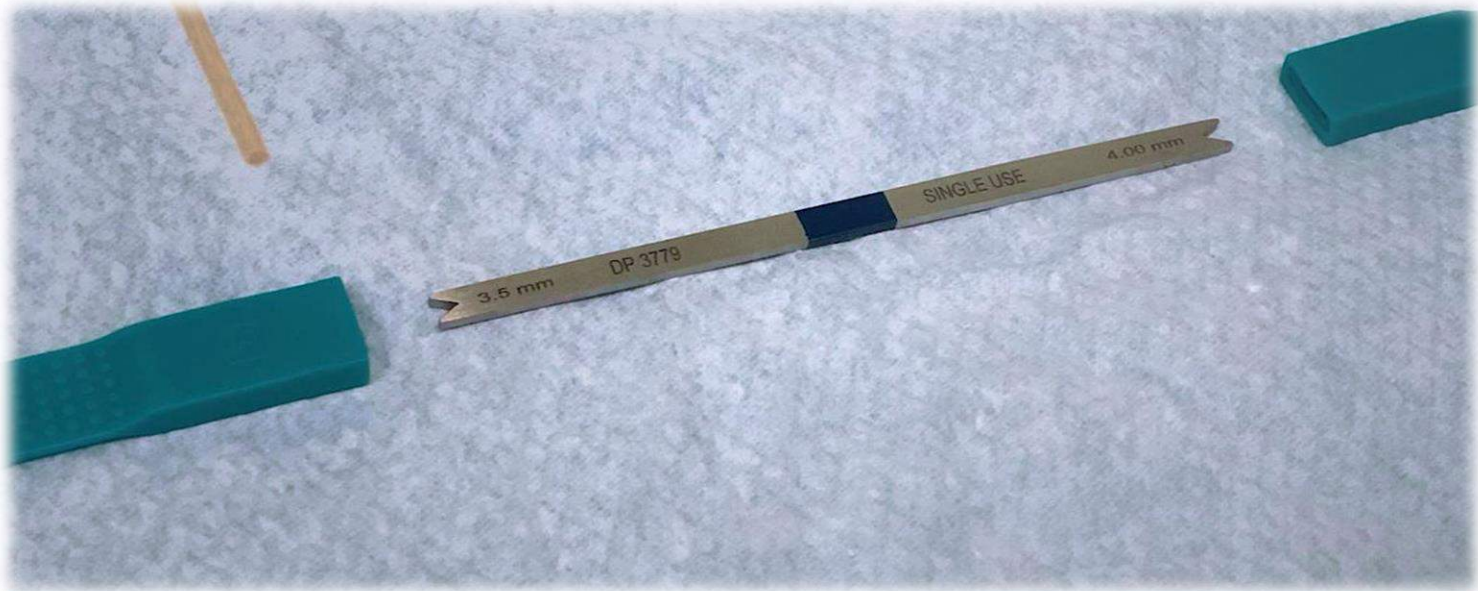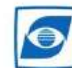

Singapore National  
Eye Centre  
SingHealth

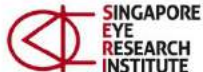

SINGAPORE  
EYE  
RESEARCH  
INSTITUTE

# Performing IVT Injection:

## During procedure: Administering IVT therapy

- Instruct patient to look away from the site of injection.
- Circulating nurse to facilitate patient to focus on a point (finger/pen)
- Provide reassurance on the feeling of slight pressure during the injection

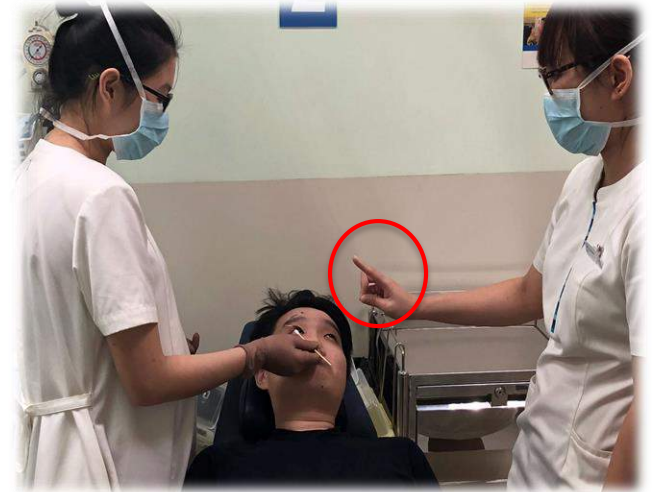

Singapore National  
Eye Centre  
SingHealth

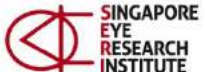

SINGAPORE  
EYE  
RESEARCH  
INSTITUTE

# Performing IVT Injection:

## During procedure: Administering IVT therapy

1. Marking site of injection with a caliper:
  - 3.5 – 4 mm away from limbus
2. Slow administration of medication into the vitreous cavity.

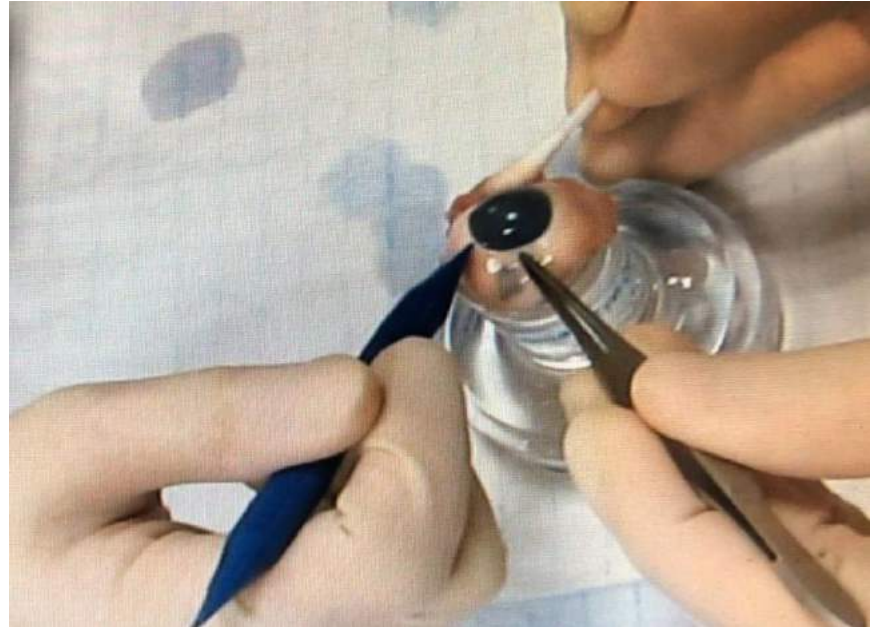

Singapore National  
Eye Centre  
SingHealth



SINGAPORE  
EYE  
RESEARCH  
INSTITUTE

# Performing IVT Injection:

## Post procedure: Vision testing

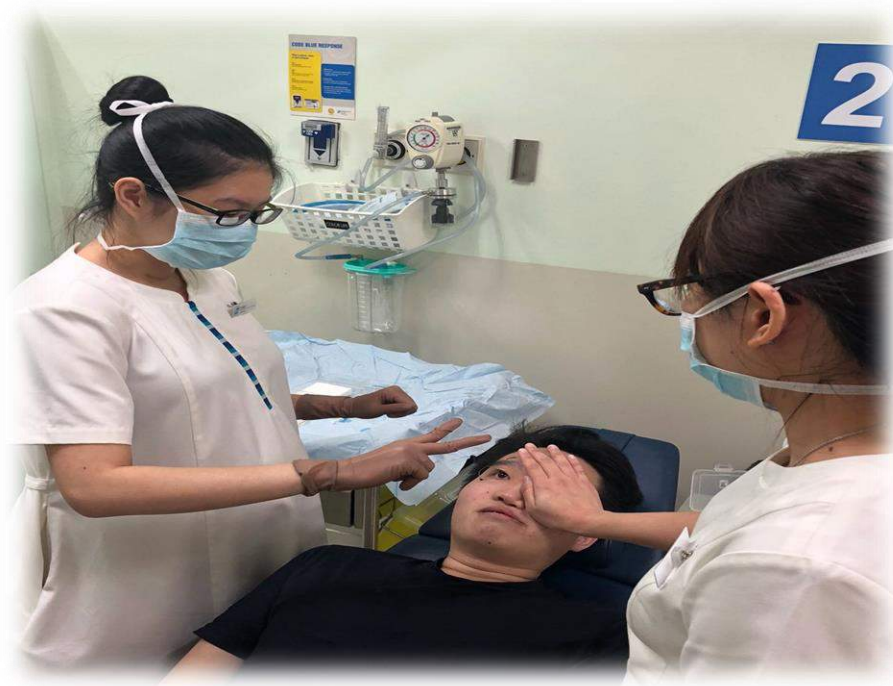

Check vision for:

- Light perception
- Ability to count fingers or able to see hand movement if baseline VA is HM

# Performing IVT Injection:

## Post procedure: Assessment

1. Assess pain score
2. Check for complications:
  - Subconjunctival bleed
  - Complain presence of bubbles/floaters
  - Foreign body sensation/discomfort
  - Corneal abrasion
  - Adverse events – Refer to Ophthalmologist



Singapore National  
Eye Centre  
SingHealth



SINGAPORE  
EYE  
RESEARCH  
INSTITUTE

# Performing IVT Injection:

## Post procedure: Patient Education

### Common Symptoms & Signs

- Subconjunctival Haemorrhage or Red Eye**  


There is usually redness on the white part of the eye at the point of injection which is due to slight bleeding. The redness may increase in size and can be left alone as it will clear in a week or two.

Subconjunctival haemorrhage can increase in size over one to two days.

Can take up to two weeks to clear:

  - No need for eye drops
  - Vision is normal
  - This is harmless
- Bubbles / Floaters**  

  - You may see "bubbles" in the eye for a few hours after the injection.
  - These bubbles are due to air trapped within the injection fluid.
  - Floaters observed are due to the movement of the jelly within the eye (vitreous) and may be seen after the injection. These can be observed for a few weeks.
- Sore and Gritty Eye**  


You may experience slight discomfort and foreign body sensation in the eye. This may last for a day or two. This is due to the cleansing agents used to sterilise the eye and is used to prevent infection. Some people are more sensitive to these agents than others and may take up to a few days to feel comfortable again.

### DON'Ts

Things not to do on the injection day

- 

1 Don't rub / press on eye
- 

2 Don't splash water into the eye
- 

3 Don't drive
- 

4 Avoid swimming
- 

5 Avoid wearing contact lens

#### IMPORTANT INFORMATION:

- Contact SNEC immediately if you develop any of the following signs or symptoms:
  - Pain
  - Blurry or decreased vision
  - Sensitivity to light (photophobia)
  - Redness of the eye (prolonged or worsening following injection)
  - Discharge from the eye
- For further assistance, you may contact the following numbers:
  - During office hours at 6227 7296 (Appointments)
  - During office hours at 6421 8518 (Retina Centre, DMC)
  - After office hours at 6932 4666 (Answering Service)

\*You may need to be seen earlier to exclude any possible infection.

For urgent consultation after office hours, Sundays and Public Holidays, please proceed to Singapore General Hospital Accident and Emergency Department (SGH A & E), located at Block 1.

**Singapore National Eye Centre**  
11 Third Hospital Avenue, Singapore 168751  
Appointments: (65) 6227 7296 Email: [appointments@sneec.com.sg](mailto:appointments@sneec.com.sg) Website: [www.sneec.com.sg](http://www.sneec.com.sg)

# Performing IVT Injection:

## Post procedure: Documentation

**Document...** Sections

- Intravitreal Injection
  - Intravitreal Treatment Note
    - Pre-Injection
    - Post-Injection**

**Treatment done**  Done  Not Done

**Done by**  Search Nurse  Search Doctor  Me  Clear

**Supervise by**  Search Nurse  Search Doctor  Me  Clear

**Nursing Care Plan**

**Post Injection Care and Advice Given**  Yes  No

**Pain Score**  0  1  2  3  4  5  6  7  8  9  10

**End of Procedure: Outcomes**

|                                                                                                                                                                                                                                                                                                                                                                         |                                                          |
|-------------------------------------------------------------------------------------------------------------------------------------------------------------------------------------------------------------------------------------------------------------------------------------------------------------------------------------------------------------------------|----------------------------------------------------------|
| <b>Uneventful Injection (Able to count fingers)</b><br>- No complication                                                                                                                                                                                                                                                                                                | <input type="checkbox"/> Yes <input type="checkbox"/> No |
| <b>Uneventful Injection with some Sequelae</b> <ul style="list-style-type: none"><li><input type="checkbox"/> Able to count finger</li><li><input type="checkbox"/> Subconjunctival bleed</li><li><input type="checkbox"/> Small bubble</li><li><input type="checkbox"/> Foreign Body Sensation / Discomfort</li><li><input type="checkbox"/> Cornea Abrasion</li></ul> | <input type="checkbox"/> Yes <input type="checkbox"/> No |
| <b>Adverse Events - Refer to Ophthalmologist</b> <ul style="list-style-type: none"><li><input type="checkbox"/> Prolonged Non-Perception of Light( NPL)</li><li><input type="checkbox"/> Unable to Count Finger (CF)</li><li><input type="checkbox"/> IVT Needle Touches the Lens</li></ul>                                                                             | <input type="checkbox"/> Yes <input type="checkbox"/> No |

**Remarks :**

Need Help? Mark Note As:  Results pending  Priority  Incomplete  Edit Calculation  Charge Capture Super Bill

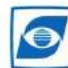

Singapore National  
Eye Centre  
SingHealth



Supplement: 41433_2020_920_MOESM3_ESM.pdf [file 41433_2020_920_MOESM3_ESM.pdf]
