# Supplementary material
Source: PubMed Central journal article supplement (PMC7784933)
Supplement: 41433_2020_920_MOESM1_ESM.pdf [file 41433_2020_920_MOESM1_ESM.pdf]

## Supplementary material 1. Review of previous studies for nurse-led intravitreal injections.

| Study                                                | Design                                       | Time Period  | Methods                                                                                                                                                                                                                                                    | Results                                                                                                                                                                                                                                                                 |
|------------------------------------------------------|----------------------------------------------|--------------|------------------------------------------------------------------------------------------------------------------------------------------------------------------------------------------------------------------------------------------------------------|-------------------------------------------------------------------------------------------------------------------------------------------------------------------------------------------------------------------------------------------------------------------------|
| Mohamed et al <sup>28</sup> , 2018 (United Kingdom)  | Prospective, single centre study             | Undefined    | Patients were recruited from a medical retina clinic, consented and randomised to treatment given by nurse or doctor. 61 patients enrolled in the study and given a modified patient questionnaire (PSQ-18). 34 were injected by nurses and 27 by doctors. | 85% had no preference for nurse-led IVT or doctor-led IVT. There was no significant difference in patient satisfaction between nurse-led IVT and doctor-led IVT.                                                                                                        |
| Kataja et al <sup>8</sup> , 2017 (Finland)           | Retrospective, single centre study           | 2008 to 2013 | Medical records of patients receiving anti-VEGF treatment for nAMD with three-loading-dose regimen were evaluated. incidence of ocular Serious Adverse Effects (SAE) amongst other outcome measures was evaluated.                                         | There was no statistically significant difference in the incidence of SAEs after injections given by nurses (10 per 9746 injections, 0.103%) or physicians (2 per 1813, 0.110%) (p=0.93)                                                                                |
| Hasler et al <sup>30</sup> , 2015, (Denmark)         | Retrospective Cohort Study                   | 2007 to 2011 | Patients receiving ranibizumab injections for CNV/DME/PDR/CSCR/BRVO/CRVO were recruited. The injections were administered by trainee ophthalmologists, vitreoretinal surgeons and 4 trained nurses.                                                        | Nurses delivered 32.5% of 38503 injections. 14 cases of endophthalmitis were recorded. 10 of which were injected by physician in training and 4 of which injected by nurse. There was no significant difference in endophthalmitis rates between the two groups.        |
| Dacosta et al <sup>19</sup> , 2014, (United Kingdom) | Retrospective Cohort Study                   | 2011 to 2013 | 4000 nurse administered injections were evaluated and a modified PSQ-18 questionnaire was administered to these patients.                                                                                                                                  | 4000 injections were delivered by nurses. There were no serious adverse events documented in the study.                                                                                                                                                                 |
| Bolme et al <sup>31</sup> , 2019, (Norway)           | Prospective, randomised, single centre study | 2015 to 2016 | Patients were recruited from patient population requiring IVT treatment. 342 patients were randomised to either doctor or nurse led IVT.                                                                                                                   | Nurse-administered intraocular injections were noninferior to physician-administered injections with regards to difference in change in BCVA at 1 year. In terms of safety, 1.8% of patients had SAE in the nurse led IVT group, versus 0% in the doctor-led IVT group. |
