# Supplementary material
Source: PubMed Central journal article supplement (PMC7784933)
Supplement: 41433_2020_920_MOESM4_ESM.pdf [file 41433_2020_920_MOESM4_ESM.pdf]

## Supplementary material 4. Questionnaire

Age:                      Gender:                      Race:                      Previous Nurse-led IVT                      Yes / No  
 Fear of IVT                      Yes / no                      Approximate no. of previous injections: first time / (                      )

Diagnosis: AMD/DME/CSC/others

The questions below are about how you feel about the care you receive when you have your eye injection. Please read each one carefully. How strongly do you AGREE or DISAGREE with each of the following statements? (Circle one number on each line)

|               |                                                                                                     | Strongly Agree | Agree | Uncertain | Disagree | Strongly Disagree |
|---------------|-----------------------------------------------------------------------------------------------------|----------------|-------|-----------|----------|-------------------|
| <b>DOCTOR</b> |                                                                                                     |                |       |           |          |                   |
| 1             | (IM) I was treated with warmth and understanding by doctors.                                        | 1              | 2     | 3         | 4        | 5                 |
| 2             | (S) When I have the eye injection, the doctors are careful in their checks before the injection.    | 1              | 2     | 3         | 4        | 5                 |
| 3             | (TS) Doctors usually spend enough time with me during the injection procedure.                      | 1              | 2     | 3         | 4        | 5                 |
| 4             | (FA) the cost of my medical care is affordable.                                                     | 1              | 2     | 3         | 4        | 5                 |
| 5             | (I/C) My eye injection procedure was explained to me clearly by doctors.                            | 1              | 2     | 3         | 4        | 5                 |
| 6             | (GS) There are some areas of the care received for the IVT injection that I am not fully satisfied. | 1              | 2     | 3         | 4        | 5                 |
| 7             | (SC) The doctor made sure I was comfortable and pain free during my injection.                      | 1              | 2     | 3         | 4        | 5                 |
| <b>NURSE</b>  |                                                                                                     |                |       |           |          |                   |
| 1             | (IM) I was treated with warmth and understanding by nurses.                                         | 1              | 2     | 3         | 4        | 5                 |
| 2             | (S) When I have the eye injection, nurses are careful in their checks before the injection.         | 1              | 2     | 3         | 4        | 5                 |
| 3             | (TS) Nurses usually spend enough time with me during the injection procedure.                       | 1              | 2     | 3         | 4        | 5                 |
| 4             | (FA) the cost of my medical care is affordable.                                                     | 1              | 2     | 3         | 4        | 5                 |
| 5             | (I/C) My eye injection procedure was explained to me clearly by nurses.                             | 1              | 2     | 3         | 4        | 5                 |
| 6             | (GS) There are some areas of the care received for the IVT injection that I am not fully satisfied. | 1              | 2     | 3         | 4        | 5                 |
| 7             | (SC) The nurse made sure I was comfortable and pain free during my injection.                       | 1              | 2     | 3         | 4        | 5                 |

GS = general satisfaction; S = Safety; IM = interpersonal manner; FA = financial aspects; I/C = Information / communication; TS = Time spent with the staff; SC = staff competence.
